# Supplementary material
Source: PubMed Central journal article supplement (PMC5666050)
Supplement: ajtr0009-4402-f7.pdf [file ajtr0009-4402-f7.pdf]

miR-665 inhibits VSMCs proliferation

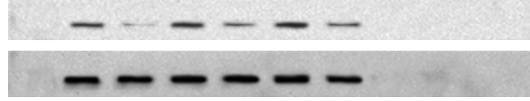

**Figure S1.** Gel blot for FGF9 (row 1) and  $\beta$ -actin (row 2) proteins.

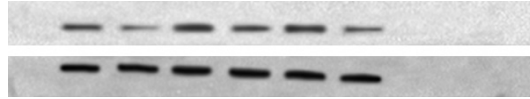

**Figure S2.** Gel blot for MEF2D (row 1) and  $\beta$ -actin (row 2) proteins.

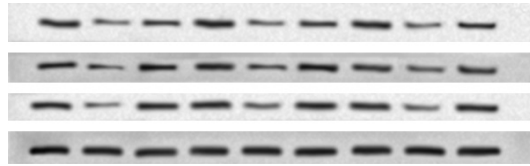

**Figure S3.** Gel blot for  $\beta$ -catenin (row 1), c-myc (row 2), cyclin D1 (row 3) and  $\beta$ -actin (row 4) proteins.
